# Supplementary material
Source: HighWire-hosted journal article supplement (https://gut.bmj.com/content/gutjnl-2016-313271)
Supplement: inline-supplementary-material-1 [file inline-supplementary-material-1.xls]

## Sheet: ST1
	p-value	q-value
Abiotrophia	NA	NA
Acetanaerobacterium	0.58869	1
Acetitomaculum	0.37109	1
Acetivibrio	NA	NA
Acidaminococcus	0.75548	1
Acidovorax	1	1
Acinetobacter	1	1
Actinomyces	0.56752	1
Aeromonas	NA	NA
Akkermansia	0.05021	0.76293
Alistipes	0.65734	1
Allisonella	0.20337	1
Allobaculum	1	1
Alloscardovia	1	1
Anaerococcus	0.19747	1
Anaerofilum	NA	NA
Anaerofustis	0.25369	1
Anaeroglobus	0.37109	1
Anaeroplasma	0.18145	1
Anaerorhabdus	1	1
Anaerosphaera	NA	NA
Anaerosporobacter	0.66461	1
Anaerostipes	0.29134	1
Anaerotruncus	0.51865	1
Anaerovorax	NA	NA
Aquabacterium	0.14891	1
Arcobacter	NA	NA
Atopobium	0.40702	1
Bacteroides	0.18312	1
Barnesiella	0.12637	1
Bifidobacterium	0.41606	1
Bilophila	0.19399	1
Blautia	0.25603	1
Bulleidia	0.14891	1
Butyricicoccus	0.86808	1
Butyricimonas	0.06674	0.76293
Campylobacter	0.58621	1
Catenibacterium	0.03013	0.68849
Cerasicoccus	0.64018	1
Cetobacterium	1	1
Cloacibacillus	0.0253	0.68849
Cloacibacterium	1	1
Clostridium_III	1	1
Clostridium_IV	0.22118	1
Clostridium_XI	0.45524	1
Clostridium_XVIII	0.5237	1
Clostridium_XlVa	0.64512	1
Clostridium_XlVb	0.4842	1
Clostridium_sensu_stricto	0.26843	1
Collinsella	0.93874	1
Comamonas	NA	NA
Coprobacillus	1	1
Coprococcus	0.90371	1
Corynebacterium	0.42371	1
Cronobacter	1	1
Delftia	NA	NA
Desulfovibrio	0.63928	1
Dialister	0.54374	1
Dorea	0.23272	1
Eggerthella	0.87791	1
Elusimicrobium	1	1
Enterococcus	0.75153	1
Enterorhabdus	0.77384	1
EscherichiaShigella	0.75507	1
Eubacterium	0.62453	1
Faecalibacterium	0.16417	1
Finegoldia	0.77283	1
Flavonifractor	0.05063	0.76293
Fusobacterium	0.05447	0.76293
Gardnerella	1	1
Gemella	0.37749	1
Gemmiger	0.56177	1
Gordonibacter	0.4125	1
Granulicatella	0.77283	1
Hafnia	NA	NA
Holdemania	0.34906	1
Howardella	0.12768	1
Hydrogenoanaerobacterium	0.07076	0.76293
Jonquetella	NA	NA
Kocuria	NA	NA
Lactobacillus	0.91581	1
Lactococcus	0.28307	1
Lactonifactor	0.05783	0.76293
Leuconostoc	0.45413	1
Mannheimia	NA	NA
Megamonas	0.85392	1
Megasphaera	0.07295	0.76293
Methanobrevibacter	0.76125	1
Methanosphaera	0.18462	1
Mitsuokella	1	1
Mobiluncus	1	1
Mogibacterium	0.25113	1
Morganella	1	1
Neisseria	NA	NA
Odoribacter	0.62698	1
Olsenella	0.49769	1
Oribacterium	0.57161	1
Oscillibacter	0.45154	1
Papillibacter	0.58977	1
Parabacteroides	0.0231	0.68849
Paraprevotella	0.23822	1
Parasutterella	0.45514	1
Parvimonas	1	1
Pediococcus	0.37109	1
Pelomonas	0.09534	0.88627
Peptococcus	0.71749	1
Peptoniphilus	1	1
Peptostreptococcus	NA	NA
Phascolarctobacterium	0.85132	1
Porphyromonas	0.8211	1
Prevotella	0.90963	1
Providencia	NA	NA
Pseudobutyrivibrio	1	1
Pseudoflavonifractor	0.88794	1
Pyramidobacter	1	1
Rhizobium	NA	NA
Roseburia	0.96783	1
Rothia	0.08897	0.85893
Ruminococcus	0.6302	1
Salmonella	1	1
Sarcina	NA	NA
Scardovia	0.77283	1
Serratia	1	1
Shuttleworthia	1	1
Slackia	0.83505	1
Solobacterium	0.8211	1
Sporobacter	0.84958	1
Staphylococcus	0.42371	1
Streptococcus	0.70015	1
Streptophyta	0.85075	1
Subdoligranulum	0.25036	1
Succinatimonas	0.18145	1
Succinivibrio	0.50664	1
Sutterella	0.03017	0.68849
Thermogymnomonas	NA	NA
Tumebacillus	1	1
Turicibacter	0.76464	1
Varibaculum	1	1
Veillonella	0.15213	1
Victivallis	1	1
Weissella	0.37109	1
Xylanibacter	1	1
unclassified_Acanthopleuribacteraceae	NA	NA
unclassified_Acetobacteraceae	0.85011	1
unclassified_Acholeplasmataceae	1	1
unclassified_Acidaminococcaceae	0.95487	1
unclassified_Actinomycetaceae	0.77283	1
unclassified_Aerococcaceae	0.05334	0.76293
unclassified_Aeromonadaceae	1	1
unclassified_Alcaligenaceae	0.34578	1
unclassified_Alicyclobacillaceae	1	1
unclassified_Alteromonadaceae	1	1
unclassified_Anaerolineaceae	1	1
unclassified_Anaeroplasmataceae	0.14154	1
unclassified_Anaplasmataceae	1	1
unclassified_Bacillaceae	0.07107	0.76293
unclassified_Bacillales	1	1
unclassified_Bacteroidaceae	0.01095	0.54795
unclassified_Bacteroidales	0.32749	1
unclassified_Bdellovibrionaceae	0.17915	1
unclassified_Beijerinckiaceae	NA	NA
unclassified_Beutenbergiaceae	NA	NA
unclassified_Bifidobacteriaceae	0.78973	1
unclassified_Bogoriellaceae	1	1
unclassified_Bradyrhizobiaceae	1	1
unclassified_Brucellaceae	1	1
unclassified_Bryobacter	0.627	1
unclassified_Burkholderiaceae	1	1
unclassified_Burkholderiales	0.07076	0.76293
unclassified_Carnobacteriaceae	0.79026	1
unclassified_Cellulomonadaceae	NA	NA
unclassified_Chitinophagaceae	0.66531	1
unclassified_Chloroplast	1	1
unclassified_Chromatiaceae	NA	NA
unclassified_Clostridiaceae	0.04662	0.76293
unclassified_Clostridiales	0.01084	0.54795
unclassified_Comamonadaceae	0.10476	0.90669
unclassified_Coriobacteriaceae	0.9639	1
unclassified_Cryomorphaceae	0.0131	0.54795
unclassified_Cyclobacteriaceae	1	1
unclassified_Cystobacteraceae	1	1
unclassified_Cytophagaceae	1	1
unclassified_Deferribacteraceae	0.34578	1
unclassified_Dehalogenimonas	1	1
unclassified_Dermacoccaceae	NA	NA
unclassified_Dermatophilaceae	1	1
unclassified_Desulfarculaceae	NA	NA
unclassified_Desulfobacteraceae	0.78353	1
unclassified_Desulfobulbaceae	1	1
unclassified_Desulfohalobiaceae	1	1
unclassified_Desulfomicrobiaceae	0.58388	1
unclassified_Desulfovibrionaceae	0.40937	1
unclassified_Dietziaceae	NA	NA
unclassified_Ectothiorhodospiraceae	0.34578	1
unclassified_Elusimicrobiaceae	1	1
unclassified_Enterobacteriaceae	0.44611	1
unclassified_Enterococcaceae	1	1
unclassified_Erysipelotrichaceae	0.66709	1
unclassified_Eubacteriaceae	0.06342	0.76293
unclassified_Euzebyaceae	1	1
unclassified_Ferroplasmaceae	0.77283	1
unclassified_Flammeovirgaceae	1	1
unclassified_Flavobacteriaceae	1	1
unclassified_Fusobacteriaceae	0.77283	1
unclassified_Gallaecimonas	NA	NA
unclassified_Geminicoccus	0.48151	1
unclassified_Gilvimarinus	NA	NA
unclassified_Gracilibacteraceae	0.01197	0.54795
unclassified_Halanaerobiaceae	1	1
unclassified_Halobacteriaceae	1	1
unclassified_Halobacteroidaceae	0.14891	1
unclassified_Halomonadaceae	0.17357	1
unclassified_Haloplasmataceae	0.21175	1
unclassified_Heliobacteriaceae	0.33281	1
unclassified_Holophagaceae	NA	NA
unclassified_Hyphomicrobiaceae	0.33646	1
unclassified_Hyphomonadaceae	0.75043	1
unclassified_Ignavibacteriaceae	1	1
unclassified_Incertae	0.27406	1
unclassified_Kiloniellaceae	0.39272	1
unclassified_Kofleriaceae	0.14387	1
unclassified_Lachnospiraceae	0.84547	1
unclassified_Lactobacillaceae	0.82441	1
unclassified_Lentisphaeraceae	1	1
unclassified_Leuconostocaceae	1	1
unclassified_Marinifilum	NA	NA
unclassified_Marinilabiaceae	0.70605	1
unclassified_Mariprofundaceae	0.77283	1
unclassified_Methanobacteriaceae	1	1
unclassified_Methanocellaceae	1	1
unclassified_Methanomicrobiaceae	NA	NA
unclassified_Methanosarcinaceae	0.07186	0.76293
unclassified_Methylococcaceae	1	1
unclassified_Microbacteriaceae	1	1
unclassified_Micrococcaceae	NA	NA
unclassified_Nakamurellaceae	1	1
unclassified_Nannocystaceae	1	1
unclassified_Natranaerobiaceae	0.39386	1
unclassified_Neisseriaceae	0.32038	1
unclassified_Oceanospirillaceae	0.34578	1
unclassified_Oceanospirillales	NA	NA
unclassified_Oleiphilaceae	1	1
unclassified_Oxalobacteraceae	0.78259	1
unclassified_Paenibacillaceae	0.58071	1
unclassified_Pasteurellaceae	0.4228	1
unclassified_Peptococcaceae	0.68684	1
unclassified_Peptostreptococcaceae	0.98839	1
unclassified_Piscirickettsiaceae	1	1
unclassified_Planctomycetaceae	NA	NA
unclassified_Planococcaceae	1	1
unclassified_Porphyromonadaceae	0.2699	1
unclassified_Prevotellaceae	0.02689	0.68849
unclassified_Prolixibacter	0.4436	1
unclassified_Pseudomonadaceae	NA	NA
unclassified_Puniceicoccaceae	0.47426	1
unclassified_Rhizomicrobium	0.26929	1
unclassified_Rhodobacteraceae	0.57161	1
unclassified_Rhodobiaceae	0.39854	1
unclassified_Rhodocyclaceae	0.3447	1
unclassified_Rhodospirillaceae	0.47648	1
unclassified_Rhodothermaceae	NA	NA
unclassified_Rickettsiaceae	0.30205	1
unclassified_Rikenellaceae	0.73172	1
unclassified_Ruminococcaceae	0.00758	0.54795
unclassified_Saprospiraceae	1	1
unclassified_Simkaniaceae	NA	NA
unclassified_Solimonas	1	1
unclassified_Sphingobacteriaceae	0.52977	1
unclassified_Spirochaetaceae	NA	NA
unclassified_Streptococcaceae	1	1
unclassified_Succinivibrionaceae	1	1
unclassified_Sutterellaceae	0.35625	1
unclassified_Synergistaceae	0.17775	1
unclassified_Syntrophaceae	NA	NA
unclassified_Syntrophobacteraceae	1	1
unclassified_Syntrophomonadaceae	0.35863	1
unclassified_Syntrophorhabdaceae	NA	NA
unclassified_TM7	1	1
unclassified_Thermoactinomycetaceae	0.10312	0.90669
unclassified_Thermoanaerobacteraceae	0.52465	1
unclassified_Thermodesulfobacteriaceae	1	1
unclassified_Thermofilaceae	NA	NA
unclassified_Thermoleophilaceae	1	1
unclassified_Thermolithobacteraceae	NA	NA
unclassified_Thermoplasmatales	0.4404	1
unclassified_Thiohalobacter	1	1
unclassified_Thiotrichaceae	0.08897	0.85893
unclassified_Thiotrichales	1	1
unclassified_Veillonellaceae	0.00997	0.54795
unclassified_Verrucomicrobiaceae	0.51817	1
unclassified_Vibrionaceae	1	1
unclassified_Victivallaceae	0.19997	1
unclassified_Waddliaceae	1	1
unclassified_Xanthomonadaceae	0.34578	1

## Sheet: ST2
Cross-over analyse		p-value
	inulin versus placebo	no stratification	enterotype stratified	gender stratified
observed richness	lower with inulin	0.01177	0.028	0.01076
estimated richness (Chao1)	lower with Inulin	0.0737	0.2985	0.07942
evenness (J)	lower with inulin	0.5445	0.7675	0.5414
diversity (Shannon)	lower with Inulin	0.8875	0.6264	0.8935
Carry-over analysis (V2 vs V4, IP-group)
	inulin versus placebo	p-value
observed richness	lower with inulin	0.08969
Spearman correlation observed richness and stool parameters
	rho	p-value	q-value
observed richness - stool frequency	-0.155744	0.1686	0.3372
observed richness - stool consistency	-0.00380285	0.4907	0.4907

## Sheet: ST3
A
Volunteer	Run-in placebo	placebo	Run-in inulin	Inulin
1	Rum	Prev	Rum	Prev
3	Rum	Rum	Rum	Rum
4	Bact	Bact	NA	Prev
5	Rum	Rum	Rum	Rum
6	Bact	Bact	Bact	Bact
7	Rum	Rum	Rum	Bact
8	Bact	Bact	Bact	Bact
9	Bact	Bact	Bact	Bact
10	Bact	Rum	Rum	Rum
11	Bact	Bact	Bact	Bact
12	Bact	Bact	Bact	Bact
13	Rum	Rum	Rum	Rum
14	Bact	Bact	Bact	Bact
15	Bact	Bact	Bact	Bact
16	Rum	Bact	Bact	Bact
17	Bact	Bact	Bact	Bact
20	Bact	Rum	NA	NA
21	Rum	Rum	Rum	Rum
22	Bact	Bact	Prev	Bact
23	Bact	Bact	Bact	Bact
24	Bact	Bact	Bact	Bact
25	Bact	Bact	Bact	Bact
27	Rum	Rum	Bact	Rum
30	Rum	Rum	Rum	Rum
31	Bact	Bact	Rum	Bact
32	Bact	Bact	Bact	Bact
33	Bact	Bact	Bact	Bact
34	Rum	Rum	Bact	Bact
35	Rum	Rum	Rum	Rum
36	Bact	Bact	Rum	Bact
39	Rum	Rum	Rum	Rum
40	Rum	Prev	Prev	Prev
41	Bact	Bact	Prev	Prev
44	Rum	Bact	Bact	Bact
46	Bact	Bact	Bact	Bact
48	Prev	Rum	Rum	Prev
49	Bact	Rum	Bact	Bact
51	Bact	Bact	Bact	Bact
52	Bact	Bact	Bact	Bact
53	Bact	Rum	Bact	Bact
54	Bact	Bact	Bact	Bact
55	Prev	Rum	Rum	Prev
56	Bact	Rum	Bact	Rum
57	Rum	Rum	Rum	Rum
58	Bact	Bact	Bact	Bact
59	Bact	Bact	Bact	Bact
60	Bact	Bact	Bact	Bact
61	Rum	Rum	Rum	Rum
62	Rum	Rum	Rum	Rum
63	Rum	Rum	NA	Rum
B.1
	Bact	Prev	Rum
Inulin	26	4	11
Placebo	24	1	17
Run-in inulin	24	2	14
Run-in placebo	27	18	13
B.2
	Bact	Prev	Rum
Inulin	29	6	14
Placebo	27	2	21
Run-in inulin	27	3	17
Run-in placebo	30	2	18
C.1
	Placebo	Inulin
Enterotype changed	8	8
Enterotype did not change	34	31
C.2
	Placebo	Inulin
Enterotype changed	11	9
Enterotype did not change	39	38

## Sheet: ST4
A
	Observed change with inulin intake	p-value	q-value
Abiotrophia	less abundant	0.40343	0.76124
Acetanaerobacterium	less abundant	0.25296	0.75549
Acetitomaculum	equal	1	1
Acetivibrio	more abundant	0.40343	0.76124
Acidaminococcus	less abundant	0.62163	0.85996
Acidovorax	equal	NA	NA
Acinetobacter	less abundant	0.17001	0.75549
Actinomyces	less abundant	0.75537	0.94515
Aeromonas	less abundant	0.27959	0.75549
Akkermansia	less abundant	0.79272	0.97743
Alistipes	less abundant	0.35781	0.76124
Allisonella	more abundant	0.56403	0.84273
Allobaculum	less abundant	0.86036	0.98931
Alloscardovia	less abundant	0.54122	0.83823
Anaerococcus	less abundant	0.12308	0.75549
Anaerofilum	equal	NA	NA
Anaerofustis	less abundant	0.48374	0.82402
Anaeroglobus	equal	NA	NA
Anaeroplasma	more abundant	0.62096	0.85996
Anaerorhabdus	less abundant	0.17001	0.75549
Anaerosphaera	less abundant	0.40343	0.76124
Anaerosporobacter	less abundant	0.21056	0.75549
Anaerostipes	more abundant	0.00011	0.00991
Anaerotruncus	less abundant	0.15733	0.75549
Anaerovorax	more abundant	0.27959	0.75549
Aquabacterium	less abundant	0.54122	0.83823
Arcobacter	equal	NA	NA
Atopobium	more abundant	0.24458	0.75549
Bacteroides	less abundant	0.50707	0.83739
Barnesiella	less abundant	0.26952	0.75549
Bifidobacterium	more abundant	3e-05	0.00747
Bilophila	less abundant	0.00012	0.00991
Blautia	less abundant	0.80506	0.98786
Bulleidia	equal	NA	NA
Butyricicoccus	more abundant	0.68361	0.89967
Butyricimonas	less abundant	0.28588	0.75639
Campylobacter	less abundant	0.50771	0.83739
Catenibacterium	more abundant	0.71043	0.91727
Cerasicoccus	less abundant	0.09591	0.75549
Cetobacterium	equal	NA	NA
Cloacibacillus	less abundant	0.17942	0.75549
Cloacibacterium	equal	NA	NA
Clostridium_III	less abundant	0.33231	0.76124
Clostridium_IV	less abundant	0.56299	0.84273
Clostridium_XI	less abundant	0.06959	0.75549
Clostridium_XVIII	less abundant	0.49002	0.82427
Clostridium_XlVa	less abundant	0.39314	0.76124
Clostridium_XlVb	less abundant	0.47751	0.82402
Clostridium_sensu_stricto	less abundant	0.04781	0.75549
Collinsella	more abundant	0.08732	0.75549
Comamonas	equal	NA	NA
Coprobacillus	less abundant	0.21801	0.75549
Coprococcus	more abundant	0.8851	0.98931
Corynebacterium	more abundant	1	1
Cronobacter	less abundant	1	1
Delftia	more abundant	0.27959	0.75549
Desulfovibrio	less abundant	0.46643	0.81706
Dialister	more abundant	0.6548	0.88
Dorea	less abundant	0.46174	0.81446
Eggerthella	more abundant	0.41247	0.76124
Elusimicrobium	more abundant	0.33223	0.76124
Enterococcus	more abundant	0.04657	0.75549
Enterorhabdus	less abundant	0.06949	0.75549
EscherichiaShigella	more abundant	0.57559	0.84999
Eubacterium	less abundant	0.98695	1
Faecalibacterium	more abundant	0.25624	0.75549
Finegoldia	less abundant	0.61113	0.85996
Flavonifractor	less abundant	0.41518	0.76124
Fusobacterium	less abundant	0.19563	0.75549
Gardnerella	more abundant	0.40343	0.76124
Gemella	equal	1	1
Gemmiger	less abundant	0.61741	0.85996
Gordonibacter	less abundant	0.00343	0.17409
Granulicatella	more abundant	0.88804	0.98931
Hafnia	less abundant	0.27959	0.75549
Holdemania	less abundant	0.00506	0.21425
Howardella	more abundant	0.58843	0.85898
Hydrogenoanaerobacterium	less abundant	0.33231	0.76124
Jonquetella	less abundant	0.40343	0.76124
Kocuria	more abundant	0.27959	0.75549
Lactobacillus	more abundant	0.32321	0.76124
Lactococcus	less abundant	0.84683	0.98931
Lactonifactor	more abundant	0.23673	0.75549
Leuconostoc	less abundant	0.93049	1
Mannheimia	less abundant	0.40343	0.76124
Megamonas	less abundant	1	1
Megasphaera	more abundant	0.92383	1
Methanobrevibacter	less abundant	0.16988	0.75549
Methanosphaera	more abundant	0.50208	0.83739
Mitsuokella	more abundant	0.17001	0.75549
Mobiluncus	less abundant	0.40343	0.76124
Mogibacterium	more abundant	0.27894	0.75549
Morganella	more abundant	0.40343	0.76124
Neisseria	less abundant	0.40343	0.76124
Odoribacter	more abundant	0.59881	0.85996
Olsenella	more abundant	0.63501	0.86337
Oribacterium	less abundant	0.74895	0.94515
Oscillibacter	less abundant	0.59914	0.85996
Papillibacter	less abundant	1	1
Parabacteroides	more abundant	0.12114	0.75549
Paraprevotella	less abundant	0.63563	0.86337
Parasutterella	less abundant	0.7219	0.92607
Parvimonas	less abundant	0.03162	0.75549
Pediococcus	more abundant	0.40343	0.76124
Pelomonas	less abundant	0.87834	0.98931
Peptococcus	more abundant	0.08595	0.75549
Peptoniphilus	less abundant	0.73337	0.93138
Peptostreptococcus	less abundant	0.54122	0.83823
Phascolarctobacterium	more abundant	0.58566	0.85898
Porphyromonas	less abundant	0.62096	0.85996
Prevotella	more abundant	0.55243	0.84023
Providencia	equal	NA	NA
Pseudobutyrivibrio	less abundant	0.62089	0.85996
Pseudoflavonifractor	less abundant	0.86884	0.98931
Pyramidobacter	less abundant	0.40343	0.76124
Rhizobium	equal	NA	NA
Roseburia	more abundant	0.6492	0.8771
Rothia	equal	NA	NA
Ruminococcus	less abundant	0.07835	0.75549
Salmonella	more abundant	0.27959	0.75549
Sarcina	less abundant	0.54122	0.83823
Scardovia	less abundant	1	1
Serratia	less abundant	0.04789	0.75549
Shuttleworthia	equal	NA	NA
Slackia	less abundant	0.75346	0.94515
Solobacterium	more abundant	0.91484	1
Sporobacter	less abundant	0.67168	0.88857
Staphylococcus	less abundant	0.07601	0.75549
Streptococcus	less abundant	0.22609	0.75549
Streptophyta	more abundant	0.54934	0.84023
Subdoligranulum	more abundant	0.85978	0.98931
Succinatimonas	less abundant	0.21816	0.75549
Succinivibrio	less abundant	0.52325	0.83823
Sutterella	more abundant	0.62635	0.85996
Thermogymnomonas	more abundant	0.27959	0.75549
Tumebacillus	equal	NA	NA
Turicibacter	more abundant	0.95377	1
Varibaculum	more abundant	1	1
Veillonella	less abundant	0.19152	0.75549
Victivallis	more abundant	0.76022	0.9461
Weissella	more abundant	0.76358	0.9461
Xylanibacter	more abundant	0.27959	0.75549
unclassified_Acanthopleuribacteraceae	equal	NA	NA
unclassified_Acetobacteraceae	less abundant	0.17001	0.75549
unclassified_Acholeplasmataceae	equal	NA	NA
unclassified_Acidaminococcaceae	less abundant	0.26575	0.75549
unclassified_Actinomycetaceae	equal	NA	NA
unclassified_Aerococcaceae	less abundant	0.87834	0.98931
unclassified_Aeromonadaceae	equal	NA	NA
unclassified_Alcaligenaceae	less abundant	0.27959	0.75549
unclassified_Alicyclobacillaceae	more abundant	0.40343	0.76124
unclassified_Alteromonadaceae	less abundant	0.40343	0.76124
unclassified_Anaerolineaceae	equal	NA	NA
unclassified_Anaeroplasmataceae	more abundant	0.98933	1
unclassified_Anaplasmataceae	more abundant	0.27959	0.75549
unclassified_Bacillaceae	less abundant	0.98729	1
unclassified_Bacillales	equal	NA	NA
unclassified_Bacteroidaceae	more abundant	0.84287	0.98931
unclassified_Bacteroidales	less abundant	0.41686	0.76124
unclassified_Bdellovibrionaceae	less abundant	0.98951	1
unclassified_Beijerinckiaceae	less abundant	0.54122	0.83823
unclassified_Beutenbergiaceae	less abundant	0.27959	0.75549
unclassified_Bifidobacteriaceae	less abundant	0.89586	0.99366
unclassified_Bogoriellaceae	less abundant	0.40343	0.76124
unclassified_Bradyrhizobiaceae	equal	NA	NA
unclassified_Brucellaceae	equal	NA	NA
unclassified_Bryobacter	less abundant	0.45274	0.80417
unclassified_Burkholderiaceae	equal	NA	NA
unclassified_Burkholderiales	less abundant	0.01026	0.37231
unclassified_Carnobacteriaceae	less abundant	0.57375	0.84999
unclassified_Cellulomonadaceae	more abundant	0.40343	0.76124
unclassified_Chitinophagaceae	more abundant	0.87117	0.98931
unclassified_Chloroplast	more abundant	0.10326	0.75549
unclassified_Chromatiaceae	equal	NA	NA
unclassified_Clostridiaceae	less abundant	0.19341	0.75549
unclassified_Clostridiales	less abundant	0.00184	0.11705
unclassified_Comamonadaceae	more abundant	0.02355	0.66469
unclassified_Coriobacteriaceae	less abundant	0.20243	0.75549
unclassified_Cryomorphaceae	less abundant	0.39823	0.76124
unclassified_Cyclobacteriaceae	equal	0.17001	0.75549
unclassified_Cystobacteraceae	equal	NA	NA
unclassified_Cytophagaceae	more abundant	0.21634	0.75549
unclassified_Deferribacteraceae	more abundant	0.88804	0.98931
unclassified_Dehalogenimonas	more abundant	0.88804	0.98931
unclassified_Dermacoccaceae	equal	NA	NA
unclassified_Dermatophilaceae	less abundant	0.40343	0.76124
unclassified_Desulfarculaceae	equal	NA	NA
unclassified_Desulfobacteraceae	less abundant	0.88085	0.98931
unclassified_Desulfobulbaceae	less abundant	0.40343	0.76124
unclassified_Desulfohalobiaceae	less abundant	0.48027	0.82402
unclassified_Desulfomicrobiaceae	more abundant	0.52222	0.83823
unclassified_Desulfovibrionaceae	less abundant	0.0536	0.75549
unclassified_Dietziaceae	less abundant	0.10333	0.75549
unclassified_Ectothiorhodospiraceae	less abundant	0.54122	0.83823
unclassified_Elusimicrobiaceae	equal	NA	NA
unclassified_Enterobacteriaceae	less abundant	0.36313	0.76124
unclassified_Enterococcaceae	more abundant	0.13023	0.75549
unclassified_Erysipelotrichaceae	less abundant	0.33103	0.76124
unclassified_Eubacteriaceae	more abundant	0.91624	1
unclassified_Euzebyaceae	less abundant	0.21801	0.75549
unclassified_Ferroplasmaceae	more abundant	0.27959	0.75549
unclassified_Flammeovirgaceae	less abundant	0.11324	0.75549
unclassified_Flavobacteriaceae	less abundant	1	1
unclassified_Fusobacteriaceae	less abundant	1	1
unclassified_Gallaecimonas	equal	NA	NA
unclassified_Geminicoccus	more abundant	0.69067	0.90428
unclassified_Gilvimarinus	equal	NA	NA
unclassified_Gracilibacteraceae	less abundant	0.14338	0.75549
unclassified_Halanaerobiaceae	more abundant	0.07601	0.75549
unclassified_Halobacteriaceae	less abundant	0.54122	0.83823
unclassified_Halobacteroidaceae	less abundant	0.41529	0.76124
unclassified_Halomonadaceae	more abundant	0.82522	0.98931
unclassified_Haloplasmataceae	more abundant	0.15171	0.75549
unclassified_Heliobacteriaceae	more abundant	0.11918	0.75549
unclassified_Holophagaceae	more abundant	0.40343	0.76124
unclassified_Hyphomicrobiaceae	less abundant	0.43049	0.77003
unclassified_Hyphomonadaceae	more abundant	0.52824	0.83823
unclassified_Ignavibacteriaceae	equal	0.17001	0.75549
unclassified_Incertae	more abundant	0.55173	0.84023
unclassified_Kiloniellaceae	less abundant	0.41958	0.76124
unclassified_Kofleriaceae	more abundant	0.71143	0.91727
unclassified_Lachnospiraceae	less abundant	0.10671	0.75549
unclassified_Lactobacillaceae	more abundant	0.01324	0.42036
unclassified_Lentisphaeraceae	more abundant	0.66261	0.88117
unclassified_Leuconostocaceae	less abundant	0.88804	0.98931
unclassified_Marinifilum	less abundant	0.27959	0.75549
unclassified_Marinilabiaceae	more abundant	0.27371	0.75549
unclassified_Mariprofundaceae	equal	NA	NA
unclassified_Methanobacteriaceae	more abundant	0.88804	0.98931
unclassified_Methanocellaceae	equal	1	1
unclassified_Methanomicrobiaceae	more abundant	0.27959	0.75549
unclassified_Methanosarcinaceae	less abundant	0.10326	0.75549
unclassified_Methylococcaceae	more abundant	0.10326	0.75549
unclassified_Microbacteriaceae	less abundant	0.33231	0.76124
unclassified_Micrococcaceae	more abundant	0.40343	0.76124
unclassified_Nakamurellaceae	equal	NA	NA
unclassified_Nannocystaceae	equal	NA	NA
unclassified_Natranaerobiaceae	less abundant	0.40867	0.76124
unclassified_Neisseriaceae	less abundant	0.84115	0.98931
unclassified_Oceanospirillaceae	equal	NA	NA
unclassified_Oceanospirillales	less abundant	0.27959	0.75549
unclassified_Oleiphilaceae	more abundant	0.21816	0.75549
unclassified_Oxalobacteraceae	more abundant	0.47433	0.82402
unclassified_Paenibacillaceae	less abundant	0.21816	0.75549
unclassified_Pasteurellaceae	less abundant	0.48662	0.82402
unclassified_Peptococcaceae	more abundant	0.11201	0.75549
unclassified_Peptostreptococcaceae	less abundant	0.73157	0.93138
unclassified_Piscirickettsiaceae	equal	NA	NA
unclassified_Planctomycetaceae	less abundant	0.40343	0.76124
unclassified_Planococcaceae	less abundant	0.20373	0.75549
unclassified_Porphyromonadaceae	more abundant	0.33708	0.76124
unclassified_Prevotellaceae	more abundant	0.84333	0.98931
unclassified_Prolixibacter	more abundant	0.06529	0.75549
unclassified_Pseudomonadaceae	less abundant	0.40343	0.76124
unclassified_Puniceicoccaceae	more abundant	0.26632	0.75549
unclassified_Rhizomicrobium	less abundant	0.66261	0.88117
unclassified_Rhodobacteraceae	less abundant	0.34519	0.76124
unclassified_Rhodobiaceae	less abundant	0.97514	1
unclassified_Rhodocyclaceae	more abundant	0.56155	0.84273
unclassified_Rhodospirillaceae	less abundant	0.33001	0.76124
unclassified_Rhodothermaceae	less abundant	0.27959	0.75549
unclassified_Rickettsiaceae	more abundant	0.70224	0.91471
unclassified_Rikenellaceae	less abundant	0.04581	0.75549
unclassified_Ruminococcaceae	less abundant	0.09556	0.75549
unclassified_Saprospiraceae	equal	1	1
unclassified_Simkaniaceae	equal	NA	NA
unclassified_Solimonas	equal	NA	NA
unclassified_Sphingobacteriaceae	less abundant	0.83498	0.98931
unclassified_Spirochaetaceae	more abundant	0.40343	0.76124
unclassified_Streptococcaceae	equal	1	1
unclassified_Succinivibrionaceae	less abundant	0.86036	0.98931
unclassified_Sutterellaceae	more abundant	0.2856	0.75639
unclassified_Synergistaceae	more abundant	0.11032	0.75549
unclassified_Syntrophaceae	more abundant	0.41529	0.76124
unclassified_Syntrophobacteraceae	more abundant	0.25102	0.75549
unclassified_Syntrophomonadaceae	more abundant	0.42917	0.77003
unclassified_Syntrophorhabdaceae	less abundant	0.17001	0.75549
unclassified_TM7	less abundant	0.27959	0.75549
unclassified_Thermoactinomycetaceae	less abundant	0.13462	0.75549
unclassified_Thermoanaerobacteraceae	less abundant	0.62545	0.85996
unclassified_Thermodesulfobacteriaceae	less abundant	0.88804	0.98931
unclassified_Thermofilaceae	less abundant	0.27959	0.75549
unclassified_Thermoleophilaceae	less abundant	1	1
unclassified_Thermolithobacteraceae	equal	NA	NA
unclassified_Thermoplasmatales	more abundant	0.21046	0.75549
unclassified_Thiohalobacter	equal	NA	NA
unclassified_Thiotrichaceae	more abundant	0.04948	0.75549
unclassified_Thiotrichales	equal	NA	NA
unclassified_Veillonellaceae	less abundant	0.11776	0.75549
unclassified_Verrucomicrobiaceae	less abundant	0.30209	0.76124
unclassified_Vibrionaceae	less abundant	0.40343	0.76124
unclassified_Victivallaceae	more abundant	0.96421	1
unclassified_Waddliaceae	equal	NA	NA
unclassified_Xanthomonadaceae	less abundant	0.62096	0.85996
B
	Observed change with inulin intake	p-value	q-value (all families)	q-value (only families of responsive genera)
Bifidobacteriaceae	more abundant	2.93984e-05	0.00420397	8.7e-05
Desulfovibrionaceae	less abundant	0.00111548	0.0531714	0.00223
Lachnospiraceae	more abundant	0.948227	1	0.948227
C
	Observed change with inulin intake	p-value	q-value (all phyla)	q-value (only phyla of responsive genera)
Actinobacteria	more abundant	0.000322679	0.00677626	8.7e-05
Firmicutes	less abundant	0.72574	0.947634	0.00223
Proteobacteria	less abundant	0.0978888	0.744067	0.948227

## Sheet: ST5
A
	r	p-value	q-value
Anaerostipes	-0.32	0.0407785	0.0611677
Bifidobacterium	0.08	0.611798	0.611798
Bilophila	-0.71	2.3e-07	6.9e-07
B
	r	p-value	q-value
Anaerostipes - Bifidobacterium	-0.09	0.57258	0.57258
Anaerostipes - Bilophila	-0.21	0.20218	0.30327
Bifidobacterium - Bilophila	0.24	0.14169	0.30327

## Sheet: ST6
	Expected change with inulin intake	Observed change with inulin intake	p-value	q-value
Bifidobacterium	more abundant	more abundant	3e-05	0.00038
Anaerostipes	more abundant	more abundant	0.00011	0.00069
Roseburia	more abundant	more abundant	0.6492	0.8079
Eubacterium	more abundant	less abundant	0.98695	0.98695
Butyricicoccus	more abundant	more abundant	0.68361	0.8079
Faecalibacterium	more abundant	more abundant	0.25624	0.66622
Akkermansia	more abundant	less abundant	0.79272	0.85878
Methanobrevibacter	more abundant	less abundant	0.16988	0.55211
Methanosphaera	more abundant	more abundant	0.50208	0.8079
Bacteroides	less abundant	less abundant	0.50707	0.8079
Escherichia-Shigella	less abundant	more abundant	0.57559	0.8079

## Sheet: ST7
	change with inulin intake	p-value	q-value
Hydrogen sulfide	more abundant	0.66261	0.91148
Hexane	less abundant	0.8864	1
1,3-Pentadiene	more abundant	0.10775	0.72495
1-Butene, 2,3-dimethyl-	less abundant	0.53101	0.81459
1-Pentanol, 4-methyl-	less abundant	0.62096	0.89187
Methanethiol	less abundant	0.51975	0.80958
3-Penten-2-one, 4-methyl- (83/98)	more abundant	0.40343	0.75939
Ethyl ether	more abundant	0.11264	0.72495
Cyclohexane (56/84)	less abundant	0.46221	0.79662
Carbon disulfide	more abundant	0.32832	0.75939
Acetaldehyde	more abundant	0.68708	0.91717
3-Methyl-2-hexene (69/98)	more abundant	0.04303	0.72495
Dimethyl sulfide	more abundant	0.22746	0.72495
3-Hexen-2-one (83/98)	less abundant	0.42928	0.77164
Furan	less abundant	0.7651	0.95336
2-Methyl-2-heptene	NA	NA	NA
octane	NA	NA	NA
Propanal	more abundant	0.94823	1
Propanal, 2-methyl-	more abundant	0.47422	0.79854
Furan, 2-methyl-	more abundant	0.09034	0.72495
2-Propenal	more abundant	0.06309	0.72495
Acetone	less abundant	0.39733	0.75939
Furan, 3-methyl-	less abundant	0.75221	0.95336
Diethyl sulfide	less abundant	0.66803	0.91464
Furan, tetrahydro-	more abundant	0.16965	0.72495
Propane, 1-(methylthio)- (61/90)	more abundant	0.3583	0.75939
Ethanone, 1-(2-furanyl)-	more abundant	0.40343	0.75939
? 2-Acetyl-5-methylfuran	less abundant	0.27959	0.72495
Methylene Chloride	more abundant	0.16965	0.72495
1,4-Cyclohexadiene, 1-methyl-	less abundant	0.27959	0.72495
Benzene	less abundant	0.42716	0.77164
Furan, 2,5-dimethyl-	more abundant	0.44255	0.78295
6-Hepten-3-one, 5-hydroxy-4-methyl-	more abundant	0.21757	0.72495
Bicyclo[4,1,0]hept-2-ene, 3,7,7-trimethyl-	NA	NA	NA
Butanal, 3-methyl-	more abundant	0.00795	0.58252
2-Butanone	more abundant	0.48595	0.7999
ethanol	less abundant	0.95724	1
Furan, 2,4-dimethyl-	less abundant	0.74633	0.95336
Isopropyl Alcohol	more abundant	0.37197	0.75939
Bicyclo[3,1,1]hept-2-ene, 3,6,6-trimethyl-	less abundant	0.25102	0.72495
Pentanal	more abundant	0.4093	0.75939
alpha,-Pinene	less abundant	0.44448	0.78295
Trichloromethane	less abundant	0.67378	0.9154
acetonitrile (HPLC?)	more abundant	0.05281	0.72495
1,6-Octadiene, 3,7-dimethyl-, (S)-	NA	NA	NA
Furan, 2-ethyl-5-methyl-	more abundant	0.5535	0.83824
Toluene	more abundant	0.50707	0.80958
3-Carene	NA	NA	NA
Butanoic acid, anhydride	NA	NA	NA
2-Acetyl-5-methylfuran	more abundant	0.97861	1
Camphene	less abundant	0.92282	1
Methyl thiolacetate	more abundant	0.31982	0.75939
2-pentanone	more abundant	0.75787	0.95336
Disulfide, dimethyl	more abundant	0.47422	0.79854
Ethanone, 1-(2-methyl-1-cyclopenten-1-yl)-	more abundant	0.10333	0.72495
1-Propanol	less abundant	0.27061	0.72495
Sabinene	less abundant	0.86036	1
Thiophene, 3(2)-methyl-	less abundant	0.36876	0.75939
beta-Pinene	less abundant	0.44625	0.78295
4-Hexen-3-one (69/98)	more abundant	0.68866	0.91717
p-Mentha-2,8-diene	NA	NA	NA
Hexanal	more abundant	0.96857	1
4-Carene	less abundant	0.88974	1
Thiophene, 3-methyl-?	more abundant	0.70314	0.92386
Ethylbenzene	more abundant	0.70177	0.92386
o-Xylene	less abundant	0.46711	0.79854
2-Butylfuran (81/124)	less abundant	1	1
3-Carene	less abundant	0.25272	0.72495
unknown 91/95/138	less abundant	0.27959	0.72495
unknown 121/136	less abundant	0.86036	1
p-Xylene	more abundant	0.90589	1
Methyl ethyl disulfide	more abundant	0.53101	0.81459
Thiophene, 2,3-dihydro-5-methyl- (85/99/100)	less abundant	0.21816	0.72495
1H-Pyrrole, 1-methyl-	more abundant	0.86036	1
alpha,-Phellandrene	less abundant	0.45908	0.79591
beta,-Myrcene	less abundant	0.77115	0.95336
1-Propanol, 2-methyl-	more abundant	0.6594	0.91134
Benzene, 1-methyl-4-(2-pentenyloxy)-??	more abundant	0.81842	0.9909
Methane, bromodichloro	more abundant	0.0033	0.48397
1,3,8-p-Menthatriene (91/119/134)	NA	NA	NA
alfa-Terpinen	less abundant	0.48489	0.7999
Butanoic acid, ethyl ester	more abundant	0.17001	0.72495
2,3-Pentanedione	less abundant	0.27959	0.72495
Limonene	more abundant	0.82327	0.99267
Furan, 2-(2-propenyl)-	NA	NA	NA
3,4(2,3)-Dimethylthiophene	NA	NA	NA
2-Thujene	less abundant	0.98296	1
2-Hexanone	less abundant	0.56074	0.83824
Benzene, propyl- (91/120)	less abundant	0.40343	0.75939
2,6-Dimethyl-1,3,5,7-octatetraene, E,E- (91/119/134)	less abundant	0.27959	0.72495
1,3,8-p-Menthatriene (91/119/134)	NA	NA	NA
Butanethioic acid, S-methyl ester (71)	NA	NA	NA
Furan, 2-pentyl-	more abundant	0.78113	0.95762
S-Methyl pentanethioate	less abundant	0.91594	1
Disulfide, methyl propyl	more abundant	0.13493	0.72495
Gamma terpinene	less abundant	0.96857	1
1,4-Cyclohexadiene, 3-ethenyl-1,2-dimethyl (91/119/134)	less abundant	1	1
1-Butanol	less abundant	0.57611	0.85686
Benzene, 1,3,5-trimethyl- (105/120)	less abundant	0.48566	0.7999
S-Methyl 3-methylbutanethioate	more abundant	0.27959	0.72495
p-Mentha-3,8-diene (79/93/121/136)	less abundant	0.27959	0.72495
Benzene, 1-methoxy-4-methyl-	more abundant	0.41209	0.75939
2,4-Dimethylthiophene	more abundant	0.44255	0.78295
Bicyclo[2,2,1]heptane, 2-methoxy-1,7,7-trimethyl-	less abundant	0.27959	0.72495
Undecane, 4,7-dimethyl-	more abundant	0.27959	0.72495
Benzene, 1-methyl-3-(1-methylethyl)-	less abundant	0.2348	0.72495
Heptanal	NA	NA	NA
Indane	less abundant	0.56074	0.83824
1-Butanol, 2-methyl-	more abundant	0.98964	1
Disulfide, methyl 2-propenyl	less abundant	0.06446	0.72495
o-Isopropenyltoluene (117/132)	less abundant	1	1
2,4-Dithiapentane (61/108/122)	NA	NA	NA
Benzene, 1-methoxy-4-methyl- (122)	more abundant	0.81548	0.9909
2-Octanone	more abundant	0.40343	0.75939
Thiocyanic acid, methyl ester	more abundant	0.40343	0.75939
Bromochloronitromethane	more abundant	0.0465	0.72495
1-Pentanol	less abundant	0.51453	0.80958
Phenol, 2-methyl-5-(1-methylethyl)- (=Thymol)	less abundant	0.27959	0.72495
Cyclohexanone	more abundant	0.76379	0.95336
Benzene, 1-methyl-3-(1-methylethyl)- (119/134)	more abundant	0.77995	0.95762
2,4,6-Octatriene, 2,6-dimethyl- (93/121/136)	more abundant	0.40343	0.75939
Tridecane	more abundant	0.21816	0.72495
2-Butanone, 3-hydroxy-	more abundant	0.86036	1
Benzeneethanol, beta-ethenyl- (115/117/118)	more abundant	0.62531	0.89374
2-Heptanol	less abundant	0.27959	0.72495
2-Acetylcyclopentanone?? (111/125/126)	NA	NA	NA
5-Hepten-2-one, 6-methyl-	less abundant	0.74052	0.95336
2-Butenal, 2-ethenyl-	more abundant	0.74413	0.95336
Benzene, 2-propenyl- (115/117/118)	more abundant	0.40343	0.75939
Phenol, 2-methyl-5-(1-methylethyl)-	NA	NA	NA
Allyl Isothiocyanate	more abundant	0.93489	1
1-Hexanol	less abundant	0.92977	1
Dimethyl trisulfide	more abundant	0.94823	1
Furan, 2-methyl-5-(methylthio)-	less abundant	0.23153	0.72495
2-Nonanone	NA	NA	NA
Nonanal	less abundant	0.18783	0.72495
3-Octanol	more abundant	0.27959	0.72495
Benzene, 1-ethyl-3,5-dimethyl- (119/134)	less abundant	0.27959	0.72495
Benzene, 1-ethenyl-2-methyl- (115/117/118)	less abundant	0.23057	0.72495
Phenol, 2-methyl-5-(1-methylethyl)- (135/150)	more abundant	0.27959	0.72495
Benzene, 1-methoxy-2-methyl- (122)	NA	NA	NA
Cyclohexanol (57/82)	more abundant	0.9489	1
2-Octanol, (S)-	less abundant	0.40343	0.75939
Benzene, 1-methyl-4-(1-methylethenyl)- (117/132)	less abundant	0.25455	0.72495
Octanoic acid, ethyl ester	more abundant	0.27959	0.72495
Benzene, 1,4-dichloro- (146/148)	NA	NA	NA
Methane, tribromo-	more abundant	0.24536	0.72495
Linalool oxide	less abundant	0.91494	1
2-Cyclohexen-1-one	more abundant	0.91494	1
1-Octen-3-ol	less abundant	0.91594	1
1-Butene, 4-isothiocyanato- (72/113)	NA	NA	NA
Benzene, 1-methoxy-2-(1-methylethenyl)- (105/133/148)	more abundant	0.27959	0.72495
Heptanol	less abundant	0.67483	0.9154
Acetic acid	more abundant	0.17804	0.72495
7-Octen-2-ol, 2,6-dimethyl-	more abundant	0.40343	0.75939
Benzene, 1,2,3,5-tetramethyl- (119/134)	more abundant	0.42881	0.77164
Furfural	more abundant	0.68708	0.91717
1-Hexanol, 2-ethyl-	more abundant	0.18674	0.72495
Benzene, 1-methyl-2-(1-methylethyl)- (119/134)	NA	NA	NA
Octanoic acid, propyl ester	more abundant	0.27959	0.72495
Decanal	more abundant	0.00521	0.50872
Benzofuran	more abundant	0.76389	0.95336
d-Camphor	less abundant	0.27959	0.72495
Ethanol, 2,2-dithiobis- ??? (112/154)	less abundant	0.27959	0.72495
2-Nonanol	more abundant	1	1
Pyrrole	less abundant	0.05021	0.72495
Camphor	NA	NA	NA
Benzaldehyde	more abundant	0.8864	1
Propanoic acid	more abundant	0.17804	0.72495
Linalool	less abundant	0.1587	0.72495
2-Undecanone	more abundant	0.27959	0.72495
unknown (73/80/121/150)	NA	NA	NA
1-Octanol	less abundant	0.61218	0.89187
Cyclohexanemethanol	less abundant	0.40343	0.75939
Hexadecane	more abundant	0.27959	0.72495
Propanoic acid, 2-methyl-	more abundant	0.92757	1
p-Menth-3-en-1-ol (81/121/136)	less abundant	0.52222	0.80958
Caryophyllene (91/93/133/161/189)	more abundant	0.27959	0.72495
Fenchol	NA	NA	NA
2-Furancarboxaldehyde, 5-methyl-	more abundant	0.32832	0.75939
trans-alfa-Bergamotene (93/119)	NA	NA	NA
Heptadecane	less abundant	0.21816	0.72495
Benzofuran, 2-methyl-	less abundant	0.26744	0.72495
Caryophyllene	less abundant	0.17001	0.72495
Neo-Menthol (95/123/138)	less abundant	0.40343	0.75939
unknown (58/109/124)	less abundant	0.17001	0.72495
p-Menth-8-en-2-one	NA	NA	NA
p-Menth-1-en-4-ol	less abundant	0.70302	0.92386
1,5,9-Decatriene, 2,3,5,8-tetramethyl- (81/95/123)	NA	NA	NA
Benzene, 1-methoxy-4-propyl- (121/150)	NA	NA	NA
1,3-Cyclohexadiene, 1,3,5,5,6,6-hexamethyl- (149/164)	NA	NA	NA
Myrcenol (59/93/121/136)	more abundant	0.40343	0.75939
Octanoic acid, butyl ester (127/145)	NA	NA	NA
Undecanal	less abundant	0.94926	1
Benzonitrile	more abundant	0.85828	1
2-Acetyl-5-methylfuran (109/124)	NA	NA	NA
Butanoic acid	more abundant	0.02034	0.72495
p-Menth-8-en-1-ol	more abundant	0.10333	0.72495
Cyclohexanol, 1-methyl-4-(1-methylethyl)-	less abundant	0.46995	0.79854
2-Decenal, (Z)-	less abundant	0.62096	0.89187
Benzeneacetaldehyde	less abundant	0.8864	1
nonanol	less abundant	0.08233	0.72495
Acetophenone	more abundant	0.35496	0.75939
3-Furanmethanol	less abundant	0.27959	0.72495
Butanoic acid, 3-methyl-	more abundant	0.90695	1
Butanoic acid, 2-methyl-	more abundant	0.84553	1
Anisole, p-allyl-	less abundant	0.52222	0.80958
cis-beta-Terpineol	more abundant	0.17001	0.72495
1-Octadecyne	more abundant	0.27959	0.72495
Heneicosane	NA	NA	NA
Benzene, 1-ethenyl-4-methoxy- (91/119/134)	less abundant	0.27959	0.72495
beta-Citral	more abundant	0.04793	0.72495
Cyclohexane, 1,1,2-trimethyl-3,5-bis(1-methylethenyl)-, (2<U+00E0>,3<U+00E1>,5<U+00E1>)-	less abundant	0.42908	0.77164
p-Menth-1-en-8-ol	more abundant	0.98964	1
Borneol	less abundant	0.95779	1
Butanoic acid, 2,2-dimethyl-	less abundant	0.07601	0.72495
Dodecanal	more abundant	3e-05	0.00774
Zingiberene	NA	NA	NA
unknown (161/189)	less abundant	0.71833	0.9396
p-Mentha-1,5-dien-8-ol(91/94)	less abundant	0.31435	0.75939
Pentanoic acid	more abundant	0.59402	0.87904
unknown (95/138)	NA	NA	NA
p-Mentha-6,8-dien-2-one (82/108)	less abundant	0.21816	0.72495
unknown (80/158)	NA	NA	NA
unknown (91/92/166)	NA	NA	NA
alpha,-Farnesene	less abundant	0.61648	0.89187
Naphthalene	more abundant	0.30134	0.75939
Acetic acid, diethyl-	NA	NA	NA
Cadinene (161/189)	more abundant	0.644	0.90851
Anisole, p-propenyl- (148)	more abundant	0.62096	0.89187
alfa-Pinene	NA	NA	NA
Citronellyl propionate (95/123/138)	more abundant	0.52222	0.80958
Tetradecanal	less abundant	0.34684	0.75939
beta-Sesquiphellandrene	less abundant	0.11336	0.72495
alfa-Curcumene (105/119/132)	less abundant	0.40422	0.75939
p-Menth-8-en-2-ol???	more abundant	0.40343	0.75939
unknown (119/162)	more abundant	0.11336	0.72495
Nonadecane	more abundant	0.27959	0.72495
p-Mentha-1,5-dien-8-ol (59/79/94)	more abundant	0.11336	0.72495
Pentadecanal- ???	less abundant	0.4094	0.75939
1-Pentanone, 1-(4-methylphenyl)- (119/134)	less abundant	0.06133	0.72495
Methyl Salicylate (120/152)	more abundant	0.40343	0.75939
Benzaldehyde, 4-(1-methylethyl)- (105/133/148)	less abundant	0.6594	0.91134
Myrtenol	less abundant	0.40343	0.75939
Pentanoic acid, 4-methyl-	less abundant	0.36876	0.75939
Undecanoic acid, methyl ester	NA	NA	NA
Sabinyl acetate (91/92/134)	NA	NA	NA
2-Dodecanone	less abundant	0.19383	0.72495
Tridecanal	less abundant	0.41209	0.75939
unknown (91/105/147/162)	less abundant	0.27959	0.72495
Benzaldehyde, 3,4-dimethyl-	more abundant	0.50781	0.80958
beta-Damascenone	less abundant	0.19285	0.72495
Ethanone, 1-(3-methoxyphenyl)- (107/135/150)	more abundant	0.40343	0.75939
Dodecanoic acid, ethyl ester	more abundant	0.27959	0.72495
p-Menth-2-en-7-ol, trans-	NA	NA	NA
Hexanoic acid	less abundant	0.34148	0.75939
Anisole, p-propenyl-	more abundant	0.89284	1
Benzenemethanol, alfa,alfa,4-trimethyl- (135/150)	less abundant	0.55536	0.83824
alfa-Ionone	less abundant	0.27959	0.72495
1-Undecanol	less abundant	0.97965	1
5,9-Undecadien-2-one, 6,10-dimethyl-	less abundant	1	1
2-Butenal, 3-phenyl- (115/145)	less abundant	0.40343	0.75939
Propanoic acid, 2-methyl-, 3-hydroxy-2,4,4-trimethylpentyl ester (71/89)	more abundant	0.64805	0.90851
Phenol, 2-methoxy- (81/109/124)	less abundant	0.27959	0.72495
1H-Indene, 1-ethylidene- (115/141/142)	less abundant	1	1
Propanoic acid, 2-methyl-, 2,2-dimethyl-1-(2-hydroxy-1-methylethyl)propyl ester	more abundant	0.35436	0.75939
Benzyl Alcohol	more abundant	0.50426	0.80958
Benzenepropanoic acid, ethyl ester (91/104/178)	more abundant	0.27959	0.72495
unknown (153/182)	NA	NA	NA
Heptanoic acid??	less abundant	0.49924	0.80958
6-Methyl-6-(5-methylfuran-2-yl)heptan-2-one	NA	NA	NA
Octanethioic acid, S-hexyl ester (57/127)	more abundant	0.27959	0.72495
Benzocycloheptatriene (115/141/142)	less abundant	0.27959	0.72495
Phenol, 2,6-dimethyl-	more abundant	0.09034	0.72495
Phenylethyl Alcohol (91/92)	NA	NA	NA
tetradecanal	less abundant	0.2348	0.72495
Benzene, 1-isocyano-3-methyl- (90/117)	NA	NA	NA
heptanoic acid + 177	less abundant	0.60815	0.89187
1-Dodecanol	less abundant	1	1
Ethanal, 2-methyl-2-[4-(1-methylethyl)phenyl]- (133/176)	more abundant	0.27959	0.72495
Benzene, 1,4-dimethoxy- (95/123/138)	NA	NA	NA
unknown (121/136/149)	NA	NA	NA
Imidazole-5-butyric acid, 4,gamma?,gamma?-trimethyl- (123/163)	less abundant	0.68384	0.91717
4-Hydroxy-2-methylacetophenone?? (108/135/150)	more abundant	0.39459	0.75939
Phenol, 2,5-dimethyl-, acetate (122)	more abundant	0.34526	0.75939
Oxirane, hexadecyl	less abundant	0.8864	1
Phenol, 2,6-bis(1-methylethyl)- (163/178)	NA	NA	NA
unknown (157/175/190)	NA	NA	NA
Phenol	less abundant	0.38254	0.75939
Ethanone, 1-(2-hydroxy-5-methylphenyl)- (107/135/150)	NA	NA	NA
Benzene, 1,2-dimethoxy-4-(2-propenyl)- (147/163/178)	more abundant	0.17001	0.72495
1H-Indole-3-carboxylic acid, 4-hydroxy- (159/177)	less abundant	0.27959	0.72495
2-Heptanone	more abundant	0.52222	0.80958
Benzeneethanal, 4-[1,1-dimethylethyl]-alfa-methyl-	NA	NA	NA
Hexadecanal	less abundant	0.3155	0.75939
trans-Nerolidol	less abundant	0.52222	0.80958
Benzeneethanethioic acid, S-methyl ester (91/166)	more abundant	0.31982	0.75939
Benzenepropanol	less abundant	0.11336	0.72495
Lilial	NA	NA	NA
9,17-Octadecadienal	less abundant	0.81842	0.9909
Octanoic Acid	more abundant	0.32953	0.75939
Caryophyllenyl alcohol (111/123/161)	more abundant	0.93055	1
2-Propenal, 3-phenyl-	less abundant	0.6594	0.91134
unknown 191	more abundant	0.77115	0.95336
unknown (109/161)	less abundant	0.27959	0.72495
Benzenepropanoic acid	more abundant	0.27959	0.72495
beta-Ionone, methyl- (128/191)	more abundant	0.17001	0.72495
Phenol, 4-methyl-	more abundant	0.90695	1
Cyclohexanecarboxylic acid	more abundant	0.12399	0.72495
Phenol, 2-methyl-	more abundant	0.11336	0.72495
Propanoic acid, 2-methyl-, 3-phenylpropyl ester	more abundant	0.27959	0.72495
Benzenemethanol, 4-(1-methylethyl)-	NA	NA	NA
Cyclotetradecane	more abundant	0.77115	0.95336
unknown (133/161/189)	less abundant	0.27959	0.72495
Thiocyanic acid, phenylmethyl ester (91/149)	NA	NA	NA
Nonanoic acid	less abundant	0.45464	0.79291
2,6-Diisopropylnaphthalene	NA	NA	NA
Tumerone	NA	NA	NA
7-Hexadecenal, (Z)-	less abundant	0.97904	1
Eugenol	less abundant	0.40343	0.75939
Phenol, 4-ethyl-	more abundant	0.48272	0.7999
Benzoic acid, 4-ethoxy-, ethyl ester	more abundant	0.74534	0.95336
unknown (91/104/133/150)	NA	NA	NA
1beta-Cadin-4-en-10-ol	more abundant	0.27959	0.72495
Propanoic acid, 2-methyl-, 3-phenylpropyl ester (91/117/118)	NA	NA	NA
Benzene, 1-(1,5-dimethyl-4-hexenyl)-4-methyl- (119/132)	less abundant	0.27959	0.72495
alfa-Eudesmol	less abundant	0.27959	0.72495
5-Acetyl-2-methylpyridine (92/120/135)	less abundant	0.97965	1
unknown (149/164)	less abundant	0.27959	0.72495
2-(Cyclohex-1-enyl)-furan	NA	NA	NA
unknown (105/120)	NA	NA	NA
unknown (91/119/159)	NA	NA	NA
unknown (129)	NA	NA	NA
Thiophene, tetrahydro-, 1,1-dioxide (120)	more abundant	0.17001	0.72495
Benzene, 1-(1,5-dimethyl-4-hexenyl)-4-methyl- (83/119/132)	less abundant	0.11336	0.72495
n-decanoic acid	more abundant	0.5562	0.83824
unknown (187)	less abundant	0.27959	0.72495
Phenol, 4-propyl- (107/136)	more abundant	0.21133	0.72495
Cyclotridecane	less abundant	0.01832	0.72495
unknown (192)	more abundant	0.38109	0.75939
3-(Cyclohex-1-enyl)-furan	NA	NA	NA
2-Decene, 2,4-dimethyl- (83/168)	more abundant	0.40343	0.75939
unknown (191)	more abundant	0.92036	1
1-Heptadecyne	more abundant	0.27959	0.72495
Benzoic acid, 2-hydroxy-, pentyl ester (120/138)	more abundant	0.86036	1
cis-9-Hexadecenal	less abundant	0.92438	1
Diethyl Phthalate	less abundant	0.63732	0.90648
2(3H)-Furanone, 5-heptyldihydro-	more abundant	0.27444	0.72495
Benzoic Acid	more abundant	0.27959	0.72495
unknown (129/157)	more abundant	0.27959	0.72495
Indole	more abundant	0.29082	0.74745
Dodecanoic acid	less abundant	1	1
Phenol, 2,4-bis(1,1-dimethylethyl)-	less abundant	0.27959	0.72495
Benzophenone (105/182)	NA	NA	NA
1H-Indole, 3-methyl-	more abundant	0.74534	0.95336
Diisobutyl phthalate	more abundant	0.64565	0.90851
Benzeneacetic acid	more abundant	0.27959	0.72495

## Sheet: ST8
	rho	p-value	q-value
Anaerostipes	0.502091	1.0708e-10	9e-09
Bifidobacterium	0.290644	0.000372516	0.0055
Bilophila	-0.139857	0.0922477	0.09225

## Sheet: ST9
Dodecanal
	rho	p-value	q-value
Energy intake (kcal)	-0.143046	0.114476	0.504616
water (g)	0.0811611	0.371676	0.755979
protein (g)	-0.118156	0.193053	0.612939
Energy of protein (%)	0.0403354	0.657799	0.790787
fat (g)	-0.0433891	0.633262	0.790787
Energy of fat (%)	0.138654	0.126154	0.504616
carbohydrates (g)	-0.245463	0.00632759	0.101241
Energy of carbohydrate (%)	-0.0653776	0.472487	0.755979
Fiber (g)	-0.0659803	0.468406	0.755979
Alcohol (g)	-0.0755256	0.406395	0.755979
Energy of alcohol (%)	0.00620186	0.945722	0.945722
	rho	p-value	q-value
satisfaction about treatment	0.234216	0.787468	0.78747
physical discomfort	-0.0245561	0.234216	0.51638
stool frequency	0.102728	0.258195	0.51638
stool consistency	0.0634694	0.485536	0.647387

## Sheet: ST10
Bifidobacterium
	rho	p-value	q-value
Energy intake (kcal)	0.0205154	0.821802	0.954933
water (g)	-0.149212	0.0995211	0.543159
protein (g)	0.13117	0.148134	0.543159
Energy of protein (%)	0.15123	0.0949749	0.543159
fat (g)	0.0250912	0.78295	0.954933
Energy of fat (%)	0.0229632	0.800959	0.954933
carbohydrates (g)	-0.0946409	0.297764	0.65508
Energy of carbohydrate (%)	-0.0971214	0.285224	0.65508
Fiber (g)	-0.00514821	0.954933	0.954933
Alcohol (g)	-0.00679618	0.940529	0.954933
Energy of alcohol (%)	0.031542	0.729093	0.954933
Anaerostipes
	rho	p-value	q-value
Energy intake (kcal)	-0.0964786	0.288439	0.634565
water (g)	-0.0581782	0.522705	0.821393
protein (g)	-0.0451542	0.619948	0.847533
Energy of protein (%)	0.0358985	0.693436	0.847533
fat (g)	0.0094513	0.917366	0.917366
Energy of fat (%)	0.204238	0.0234563	0.12901
carbohydrates (g)	-0.252567	0.00482721	0.0530993
Energy of carbohydrate (%)	-0.161684	0.073997	0.271322
Fiber (g)	-0.147476	0.103567	0.28481
Alcohol (g)	0.0248832	0.784705	0.863176
Energy of alcohol (%)	0.068338	0.452625	0.821393
Bilophila
	rho	p-value	q-value
Energy intake (kcal)	0.224727	0.0124563	0.0900783
water (g)	0.101382	0.264516	0.581935
protein (g)	0.171208	0.0583043	0.213782
Energy of protein (%)	0.0274839	0.762838	0.839122
fat (g)	0.14721	0.104199	0.286547
Energy of fat (%)	-0.0782693	0.38951	0.612087
carbohydrates (g)	0.216078	0.0163779	0.0900783
Energy of carbohydrate (%)	0.00615413	0.946139	0.946139
Fiber (g)	0.06899	0.448315	0.616433
Alcohol (g)	0.0851181	0.349239	0.612087
Energy of alcohol (%)	-0.030757	0.735583	0.839122

[truncated: 2 more sheets: ST11, ST12]
